# Supplementary material for: Dietary Alpha-Ketoglutarate Partially Abolishes Adverse Changes in the Small Intestine after Gastric Bypass Surgery in a Rat Model
Source: MDPI journal article supplement (doi:10.3390/nu14102062), 2022-05-14
Supplement: s1 [file s1]

**Table S1.** The effect of bariatric surgery and alpha-ketoglutarate administration on histomorphometry of selected parameters of rat duodenum.

| Parameter                                             | C                          | O                          | O+AKG                      | AKG                        |
|-------------------------------------------------------|----------------------------|----------------------------|----------------------------|----------------------------|
| Number of undamaged villi/mm                          | 1.1 ± 0.8 <sup>ab</sup>    | 1.7 ± 1.4 <sup>a</sup>     | 0.4 ± 0.3 <sup>b</sup>     | 0.8 ± 0.9 <sup>b</sup>     |
| Number of damaged villi/mm                            | 3.3 ± 0.6                  | 3.8 ± 1.5                  | 3.6 ± 1.7                  | 3.8 ± 1.2                  |
| Number of open crypts/mm                              | 5.5 ± 1.7 <sup>a</sup>     | 3.2 ± 1.4 <sup>b</sup>     | 2.8 ± 0.4 <sup>b</sup>     | 3.7 ± 0.9 <sup>ab</sup>    |
| Number of closed crypts/mm                            | 13.3 ± 1.6 <sup>ab</sup>   | 10.1 ± 3.6 <sup>b</sup>    | 15.6 ± 4.1 <sup>a</sup>    | 17.2 ± 3.4 <sup>a</sup>    |
| Number of goblet cells per 100 µm of villi epithelium | 2.0 ± 1.1                  | 2.0 ± 0.9                  | 1.8 ± 0.9                  | 1.8 ± 1.0                  |
| Fractal dimension of the intestinal villi [D]         | 1.123 ± 0.040              | 1.123 ± 0.037              | 1.117 ± 0.029              | 1.111 ± 0.032              |
| Fractal dimension of the villi epithelial surface [D] | 1.765 ± 0.021 <sup>a</sup> | 1.747 ± 0.014 <sup>b</sup> | 1.769 ± 0.026 <sup>a</sup> | 1.768 ± 0.017 <sup>a</sup> |
| Fractal dimension of the lacteal space [D]            | 1.672 ± 0.040              | 1.650 ± 0.037              | 1.666 ± 0.030              | 1.665 ± 0.043              |
| Fractal dimension of the intestinal mucosa [D]        | 1.260 ± 0.134              | 1.207 ± 0.110              | 1.211 ± 0.113              | 1.212 ± 0.099              |
| Number of Meissner's nerve ganglia/mm                 | 1.3 ± 0.6                  | 0.9 ± 0.3                  | 0.4 ± 0.3                  | 0.7 ± 0.6                  |
| Number of Auerbach nerve ganglia/mm                   | 1.7 ± 0.6                  | 1.5 ± 0.6                  | 1.3 ± 0.5                  | 1.2 ± 0.5                  |
| Number of Henle's nerve ganglia/mm                    | 1.4 ± 0.5                  | 1.0 ± 0.6                  | 1.0 ± 0.8                  | 0.7 ± 0.4                  |
| Total number of nerve ganglia/mm                      | 4.4 ± 0.9                  | 3.4 ± 1.1                  | 2.8 ± 1.3                  | 2.5 ± 1.3                  |
| The shape of nerve ganglia                            | 0.6 ± 0.2                  | 0.6 ± 0.2                  | 0.6 ± 0.2                  | 0.6 ± 0.2                  |

Data are presented as mean ± SD. Different superscript letters in a row indicate significant differences between groups at  $p < 0.05$ . C – control group undergoing sham surgery; O – group undergoing gastric bypass surgery; O + AKG – group undergoing gastric bypass surgery and receiving alpha-ketoglutarate (AKG); AKG – group undergoing sham surgery and receiving alpha-ketoglutarate. AKG was administered at a dose of 0.2g/kg/body weight/day in drinking water.

**Table S2.** The effect of bariatric surgery and alpha-ketoglutarate administration on histomorphometry of selected parameters of rat jejunum.

| Parameter                                             | C                          | O                           | O + AKG                    | AKG                         |
|-------------------------------------------------------|----------------------------|-----------------------------|----------------------------|-----------------------------|
| Number of undamaged villi/mm                          | 1.7 ± 1.1                  | 1.5 ± 1.1                   | 0.7 ± 0.7                  | 1.4 ± 0.9                   |
| Number of damaged villi/mm                            | 3.0 ± 1.0                  | 3.4 ± 1.6                   | 2.8 ± 0.6                  | 4.0 ± 1.2                   |
| Number of open crypts/mm                              | 3.4 ± 1.7                  | 2.3 ± 1.4                   | 2.2 ± 1.0                  | 3.2 ± 0.8                   |
| Number of closed crypts/mm                            | 13.4 ± 2.6 <sup>b</sup>    | 8.8 ± 3.2 <sup>c</sup>      | 18.4 ± 1.9 <sup>a</sup>    | 17.8 ± 3.3 <sup>a</sup>     |
| Number of goblet cells per 100 µm of villi epithelium | 2.6 ± 1.2                  | 2.1 ± 0.8                   | 2.1 ± 0.9                  | 2.1 ± 0.9                   |
| Fractal dimension of the intestinal villi [D]         | 1.124 ± 0.052              | 1.110 ± 0.025               | 1.122 ± 0.043              | 1.111 ± 0.041               |
| Fractal dimension of the villi epithelial surface [D] | 1.759 ± 0.017              | 1.761 ± 0.022               | 1.753 ± 0.018              | 1.755 ± 0.024               |
| Fractal dimension of the lacteal space [D]            | 1.652 ± 0.032 <sup>a</sup> | 1.649 ± 0.045 <sup>ab</sup> | 1.630 ± 0.033 <sup>b</sup> | 1.643 ± 0.040 <sup>ab</sup> |
| Fractal dimension of the intestinal mucosa [D]        | 1.238 ± 0.156              | 1.180 ± 0.056               | 1.237 ± 0.103              | 1.214 ± 0.071               |
| Number of Meissner's nerve ganglia/mm                 | 0.4 ± 0.3                  | 0.4 ± 0.1                   | 0.3 ± 0.2                  | 0.4 ± 0.2                   |
| Number of Auerbach nerve ganglia/mm                   | 1.0 ± 0.5                  | 1.0 ± 0.3                   | 1.1 ± 0.4                  | 0.9 ± 0.3                   |
| Number of Henle's nerve ganglia/mm                    | 1.6 ± 0.3                  | 1.8 ± 0.3                   | 1.4 ± 0.5                  | 1.1 ± 0.6                   |
| Total number of nerve ganglia/mm                      | 3.0 ± 0.8                  | 3.2 ± 0.1                   | 2.8 ± 0.8                  | 2.4 ± 0.9                   |
| The shape of nerve ganglia                            | 0.6 ± 0.2                  | 0.6 ± 0.2                   | 0.6 ± 0.2                  | 0.6 ± 0.2                   |

Data are presented as mean ± SD. Different superscript letters in a row indicate significant differences between groups at  $p < 0.05$ . C – control group undergoing sham surgery; O – group undergoing gastric bypass surgery; O+AKG – group undergoing gastric bypass surgery and receiving alpha-ketoglutarate (AKG); AKG – group undergoing sham surgery and receiving alpha-ketoglutarate. AKG was administered at a dose of 0.2g/kg/body weight/day in drinking water.
